# Supplementary material for: PrOx catalysts for the combustion of soot generated in diesel engines: effect of CuO and 3DOM structures
Source: Royal Society of Chemistry journal article supplement (doi:10.1039/c9cy00130a), 2019-01-01
Supplement: c9cy00130a1.pdf [file c9cy00130a1.pdf]

## Supporting Information

### PrO catalysts for the combustion of soot generated in diesel engines: effect of CuO and 3DOM structures

Virginia Alcalde-Santiago, Esther Bailón-García\*, Arantxa Davó-Quiñero, Dolores Lozano-Castelló, Agustín Bueno-López

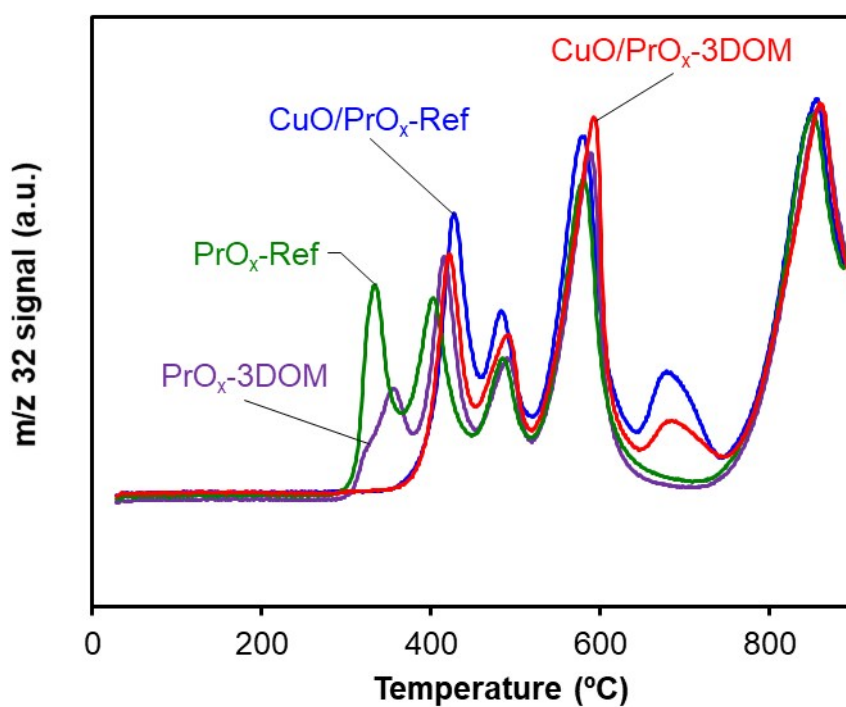

Figure S1. m/z 32 signal evolution during Ar-TPD experiments
